# Supplementary material for: Sequencing and Characterization of the Invasive Sycamore Lace Bug Corythucha ciliata (Hemiptera: Tingidae) Transcriptome
Source: PLoS One. 2016 Aug 5;11(8):e0160609. doi: 10.1371/journal.pone.0160609 (PMC4975459; doi:10.1371/journal.pone.0160609)
Supplement: S5 Table — (XLS) [file pone.0160609.s006.xls]

## Sheet: Table S3
Table S5.Juvenile hormone related genes identified in the C. Ciliata. transcriptome
Gene Name	unigene name	NR ID	NR Score	NR Evalue	NR Description
Allatostatin	c20300_g1	AKN21242.1	376	2.04609e-39	allatostatin-B precursor, partial [Locusta migratoria]
	c24086_g1	ACX47066.1	341	4.03527e-34	allatostatin A precursor [Rhodnius prolixus]
Allatostatin Receptor	c36086_g1	AJA32745.1	1160	1.8358e-147	FGLa/AST receptor [Rhodnius prolixus]
Broad	c30286_g1	ABA02191.1	867	1.06253e-107	broad [Oncopeltus fasciatus]
Juvenile Hormone Acid Methytransferas	c32490_g1	NP_001288290.1	200	5.47799e-17	phosphomethylethanolamine N-methyltransferase [Diaphorina citri]
	c54648_g1	NP_001156251.1	131	6.36198e-08	juvenile hormone acid methyltransferase [Acyrthosiphon pisum]
hexamerin	c36420_g1	CAM84196.1	662	9.33247e-71	hexamerin 1 [Perla marginata]
juvenile hormone binding protein-like precursor	c23250_g1	AHW46052.1	917	5.6697e-120	juvenile hormone binding protein-like precursor [Aphis gossypii]
juvenile hormone binding protein	c32356_g1	AGM32527.1	251	3.49804e-22	hemolymph juvenile hormone binding protein (JHBP) [Coptotermes formosanus]
	c36792_g1	AGM32527.1	242	4.23081e-21	hemolymph juvenile hormone binding protein (JHBP) [Coptotermes formosanus]
Juvenile Hormone Esterase	c36498_g1	AGT57960.1	1193	3.7061e-149	juvenile hormone esterase, partial [Bemisia tabaci]
	c61313_g1	AGT57960.1	693	6.17244e-82	juvenile hormone esterase, partial [Bemisia tabaci]
Juvenile hormone epoxide hydrolase	c33463_g1	KDR10172.1	1215	4.86449e-156	Juvenile hormone epoxide hydrolase 1 [Zootermopsis nevadensis]
methoprene-tolerant	c37392_g1	AEW22977.1	1271	5.58207e-153	methoprene-tolerant protein [Rhodnius prolixus]
Retinoid X Receptor	c33754_g1	XP_002424949.1	1465	0	retinoid X receptor, putative [Pediculus humanus corporis]
	c17862_g1	BAN20175.1	1359	1.48066e-180	retinoid-inducible serine carboxypeptidase [Riptortus pedestris]
	c38712_g2	XP_002428935.1	1464	0	retinoid X receptor, putative [Pediculus humanus corporis]
	c33522_g1	BAN20175.1	1370	2.42891e-177	retinoid-inducible serine carboxypeptidase [Riptortus pedestris]
	c27026_g1	BAN20175.1	1470	0	retinoid-inducible serine carboxypeptidase [Riptortus pedestris]
